# Supplementary material
Source: publisher figshare collection journal article supplement (https://gsajournals.figshare.com/ndownloader/files/23763953)
Supplement: Supplementary file 1 [file 23763953]

Env	Temp_Cor	Low_TempCor	High_TempCor	Humid_Cor	Dew_Cor
ARH1_2016	0.506512361186147	0.180487851070412	0.607105972674346	-0.141227996462963	0.268200401380716
ARH2_2016	-0.0757456387298113	-0.119033035099779	0.134064230530399	-0.0939043978693273	-0.109146886775368
DEH1_2014	0.971732034467292	0.898675584616872	0.951989821634708	0.906489041858876	0.983481564253302
DEH1_2015	0.978646600664419	0.97794193486118	0.963449831776446	0.906929894602104	0.992452250227907
DEH1_2016	-0.0779607600167276	0.00569143439525186	-0.0618107321467826	-0.0467150956022502	-0.10533908015321
GAH1_2014	0.990807137665334	0.892471005487068	0.981520122334005	0.905321717568703	0.983929672238117
GAH1_2015	0.987937309769808	0.984098491829453	0.982618047303625	0.936960681977729	0.988789460325077
GAH1_2016	-0.0673780131094113	-0.0257861722728333	-0.0647477408443119	0.0244843403168736	0.0131359648268537
GAH2_2016	-0.0346299679169521	0.0383447782489613	0.00911901517976848	0.0580078751601326	-0.0132123794742649
IAH1_2015	0.949288577509786	0.94709834455284	0.927533488193441	0.798140771103222	0.967454812845173
IAH1_2016	-0.11350890938765	-0.0383050258406199	-0.118336249557805	0.01889033015636	-0.124352452475688
IAH1a_2014	0.988971575794542	0.965088092198761	0.987536747618766	0.947597754772141	0.994658587295403
IAH1b_2014	0.988971575794542	0.965088092198761	0.987536747618766	0.947597754772141	0.994658587295403
IAH1c_2014	0.98984713960605	0.9679217482649	0.989263238183333	0.948620939138673	0.994819499510807
IAH2_2014	0.970850911455443	0.898216077753693	0.944521859140877	0.894244806400832	0.982168049585265
IAH2_2016	-0.0804963603121044	-0.0501875440835502	-0.155422138260645	0.130472337073803	-0.00810857937020068
IAH3_2014	0.97776714063694	0.966492282152256	0.935928228084814	0.890125733906889	0.987189860803959
IAH3_2015	0.963398039572512	0.957571061901684	0.938225388815896	0.893015916284924	0.9729418573789
IAH3_2016	-0.0811050892983684	-0.0926408126961674	-0.0707292536742965	0.0820698856897403	0.00648801097366784
IAH4_2014	0.976525552606912	0.95486513485854	0.935306904020365	0.847601102868629	0.985866856938738
IAH4_2015	0.940770535223397	0.903854901055242	0.874336350843643	0.786456555491444	0.948446068707673
IAH4_2016	0.171326613966661	0.0810528586795291	0.119824268925492	-0.105828303839828	-0.00905954499601324
ILH1 ILH2_2015	0.978697647049165	0.967694822832808	0.983608997358406	0.952465725070039	0.994978396639322
ILH1_2014	0.978607910612585	0.966878896164731	0.963121659717188	0.937595777714525	0.994123862267654
ILH1_2016	0.579584119695086	0.352952647380104	0.67527291755981	-0.0700398791251744	0.370725541659167
INH1_2014	0.988666151661932	0.965093198785924	0.934205575742773	0.857078775166728	0.991617046962342
INH1_2015	0.971147886311742	0.977586142672473	0.97210134798952	0.911717519462271	0.993822927172642
INH1_2016	0.148118456948591	0.0993903573048098	0.121484936481179	-0.117945604822934	0.0932961197374106
KSH1_2015	0.989220099422415	0.973321623159308	0.992159121357695	0.934333045248346	0.995512977605444
KSH1_2016	0.261818017702821	0.186969479079567	0.296135203180024	0.10767632616688	0.313311906789172
KSH2_2016	0.619461717101437	0.39650342258442	0.711690901288707	-0.0239661193910274	0.554584660437242
KSH3_2016	0.794839815126354	0.843696989021344	0.704493462512628	0.214770214012724	0.86094910106335
MIH1_2016	-0.00179921203709162	-0.0154535162815982	0.0198801284971948	-0.013669286513764	0.0990696323255933
MNH1_2014	0.994393245391406	0.935601924377819	0.981867444909428	0.956943435227544	0.995655615104936
MNH1_2015	0.991578573555715	0.967109821880179	0.976275146399506	0.952576838231362	0.996599891197356
MNH1_2016	-0.116702349937593	-0.113950975377305	-0.113138138685929	-0.0448233145209975	-0.00987944387729782
MOH1_2014	0.989223145405437	0.935662746806262	0.966584286842373	0.918266274550609	0.995107000034527
MOH1_2015	0.9878254705897	0.984960417209605	0.971182410893454	0.937684179426272	0.992779280994198
MOH1_2016	0.0375885971616825	0.0755614049054649	-0.00946550212925485	0.13620186202528	0.168004613170194
MOH2_2014	0.98202558899158	0.923707763629474	0.970621131195729	0.745757761927577	0.974456259198282
NCH1_2014	0.965294781887198	0.833427421672586	0.970089938547637	0.946897008879298	0.988147357940738
NCH1_2015	0.96705539920359	0.987169356542044	0.975551096310903	0.895786558824482	0.990264962808615
NCH1_2016	0.284664654654204	0.140362071540418	0.261015133594144	-0.142549706237648	0.232001843009658
NEH1_2014	0.988649724159794	0.94722083100731	0.982767484020636	0.919410356394987	0.995566763411956
NEH1_2015	0.994514654602817	0.979956017061619	0.996255213764963	0.961050493632468	0.995382667038849
NEH1_2016	0.99211722231734	0.998207813812864	0.99900727813367	0.95364265080794	0.999298109483434
NEH2_2014	0.978017541872175	0.955522493571544	0.983856578266973	0.845895584991514	0.98834585155978
NEH2_2015	0.973503852852465	0.96767906365559	0.993825320792811	0.913670705434834	0.99091863002976
NEH3_2014	0.988700912212202	0.953928221405631	0.929848998669944	0.874296596541681	0.990607574729693
NEH3_2015	0.986257852521844	0.958500488524857	0.97514182219964	0.731737513165347	0.98361318190731
NEH4_2016	0.992390746280908	0.998207396316596	0.999088717568661	0.93922400631933	0.99922193914384
NYH1_2014	0.995254058071863	0.975238696383641	0.990775956644526	0.922444159144191	0.995616683825106
NYH1_2015	0.980182344448851	0.976095027610147	0.988562303278931	0.89125907722791	0.989172450425527
NYH1_2016	0.184738287254339	0.122615568208116	0.191856318953374	-0.293771212467432	0.250472735154841
NYH2_2014	0.994833342623066	0.974773217521353	0.990491810033802	0.919516653343928	0.994542389605016
NYH2_2015	0.98175420098049	0.974818438522697	0.988940667016322	0.927693523522154	0.985603572413727
NYH2_2016	0.175903776281967	0.126744063612467	0.179015567310742	-0.301969606806474	0.225310079562978
NYH3_2015	0.983841099359794	0.977478987003131	0.984478383920845	0.900941874313991	0.990943514404691
NYH3_2016	0.236399513185564	0.155621054158261	0.154388919710532	0.171306483451265	0.281436293583272
OHH1_2015	0.976559583727191	0.97631146721882	0.951486948741209	0.919300264300028	0.992430486520304
OHH1_2016	-0.177709538249846	-0.07151021851256	-0.130772177118158	0.0869867074747312	-0.0438901742000708
ONH1_2014	0.944569155553107	0.954734529633032	0.986716156023311	0.854238123369996	0.977136068739398
ONH1_2015	0.920818024166317	0.973043199855117	0.978647803565105	0.890905418096311	0.986643199887282
ONH1_2016	-0.0425516213466532	-0.0874570601317908	-0.00110884506688486	-0.153018227672325	-0.0297580872016436
ONH2_2014	0.994265111067157	0.972109024788888	0.987950392604908	0.910097145522023	0.991002065913342
ONH2_2015	0.944304431200338	0.929423001133085	0.931698808861958	0.795613554365033	0.972934715949874
ONH2_2016	0.0185107157632143	0.0489469347703342	0.042811777682863	-0.331171638184235	0.145225389192177
SCH1_2016	-0.101775979668969	-0.336056891401854	0.148807987034481	0.16559787838231	-0.198225111321926
SDH1_2015	0.967743243275739	0.951994413323984	0.991665663028046	0.938786832856077	0.987189329599387
TXH1_2014	0.991317103272518	0.912130513259795	0.994655793818026	0.921494554633323	0.996399611148542
TXH1_2015	0.994032381654507	0.993930256451978	0.989840365688852	0.920127945041784	0.994096859187773
TXH1_2016	0.02475158236566	-0.0864360405631515	0.106770664478914	0.0132402332870294	-0.0183825138300577
TXH2_2014	0.963919869127866	0.925164888227334	0.972580546981722	0.971266843537692	0.989539055600834
TXH2_2015	0.984213799355758	0.993201486963221	0.996877067651622	0.96232464731725	0.998665178998734
WIH1_2014	0.979946914804167	0.95330549081148	0.983998747274454	0.895879616406028	0.980094825094968
WIH1_2015	0.981911013715949	0.972556686472877	0.985093472266507	0.873068005983253	0.995201380630901
WIH1_2016	0.129573820926407	0.120057971751429	0.223787339264378	0.220795788776257	0.306291674112741
WIH2_2015	0.970742973563762	0.964495802991785	0.972465956316544	0.866481870638527	0.994997229045255
WIH2_2016	0.117733982572353	0.11899092991049	0.195747472194799	0.100766385844687	0.129155862477898
